# Supplementary material for: Photo-Selective Nets and Pest Control: Searching Behavior of the Codling Moth Parasitoid Mastrus ridens (Hymenoptera: Ichneumonidae) under Varying Light Quantity and Quality Conditions
Source: MDPI journal article supplement (doi:10.3390/insects12070582), 2021-06-28
Supplement: s1 [file s1]

**Table S3.** Biological parameters of female *Mastrus ridens* ( $n=15$  (except for sex ratio), mean  $\pm$  SE) under the four treatments tested. \*Number in parenthesis corresponds to the total number of adults who emerged. Different lowercase letters in columns next to mean  $\pm$  SE indicate significant differences among treatments for each of the biological parameters according to the Kruskal-Wallis test.

| Treatments       | Biological parameters |                                      |                                               |                                                               |
|------------------|-----------------------|--------------------------------------|-----------------------------------------------|---------------------------------------------------------------|
|                  | Parasitism (%)        | Fertility (number of larvae hatched) | Realized fecundity (number of adults emerged) | Sex ratio* (% of females in relation to total adults emerged) |
| No PSN (control) | 5 $\pm$ 0.03a         | 0.9 $\pm$ 0.5a                       | 0.7 $\pm$ 0.4a                                | 30 (n = 10)a                                                  |
| Pearl PSN        | 10 $\pm$ 0.03a        | 1.0 $\pm$ 0.4a                       | 0.8 $\pm$ 0.3a                                | 33 (n = 12)a                                                  |
| Red PSN          | 7 $\pm$ 0.03a         | 0.7 $\pm$ 0.4a                       | 0.5 $\pm$ 0.3a                                | 25 (n = 8)a                                                   |
| Black SN         | 8 $\pm$ 0.03a         | 1.4 $\pm$ 0.5a                       | 0.8 $\pm$ 0.4a                                | 17 (n = 12)a                                                  |
