# Supplementary material for: Photo-Selective Nets and Pest Control: Searching Behavior of the Codling Moth Parasitoid Mastrus ridens (Hymenoptera: Ichneumonidae) under Varying Light Quantity and Quality Conditions
Source: MDPI journal article supplement (doi:10.3390/insects12070582), 2021-06-28
Supplement: s1 [file s1]

**Table S5.** Time (m) (mean  $\pm$  SE) allocated by *M. ridens* females to the behavior sub-phases from phase 2 modified from Charles et al. (2013). Different lowercase letters in columns next to mean  $\pm$  SE indicate significant differences among treatments in the time spent on each sub-phase according to the Kruskal-Wallis test. Different uppercase letters in rows indicate significant differences among the time spent on each sub-phase within each treatment according to the Wilcoxon Signed-Rank test for paired observations.

| Treatments       | Behaviors           |                     |
|------------------|---------------------|---------------------|
|                  | Searching           | Grooming            |
| No PSN (control) | 7.33 $\pm$ 1.30 aA  | 21.27 $\pm$ 1.81 aB |
| Pearl PSN        | 10.47 $\pm$ 1.63 aA | 18.53 $\pm$ 1.72 aB |
| Red PSN          | 11.00 $\pm$ 1.93 aA | 17.53 $\pm$ 2.25 aA |
| Black SN         | 9.53 $\pm$ 1.48 aA  | 20.47 $\pm$ 1.48 aB |
