# Supplementary material for: Photo-Selective Nets and Pest Control: Searching Behavior of the Codling Moth Parasitoid Mastrus ridens (Hymenoptera: Ichneumonidae) under Varying Light Quantity and Quality Conditions
Source: MDPI journal article supplement (doi:10.3390/insects12070582), 2021-06-28
Supplement: s1 [file s1]

**Table S4.** Time (m) (mean  $\pm$  SE) allocated by *M. ridens* females to the behavior sub-phases from phase 1 modified from Charles et al. (2013). The total observation time was 30 minutes. Different lowercase letters in columns next to mean  $\pm$  SE indicate significant differences among treatments in the time spent on each sub-phase according to the Kruskal-Wallis test. Different uppercase letters in rows indicate significant differences among the time spent on each sub-phase within each treatment according to the Wilcoxon Signed-Rank test for paired observations.

| Treatments       | Behaviors           |                    |                    |                    |
|------------------|---------------------|--------------------|--------------------|--------------------|
|                  | Pre-contact         | Mating             | Examination        | Acceptance         |
| No PSN (control) | 28.60 $\pm$ 1.33 aA | 0.07 $\pm$ 0.07 aB | 1.33 $\pm$ 1.33 aB | 0.00 $\pm$ 0.00 aB |
| Pearl PSN        | 29.07 $\pm$ 0.86 aA | 0.07 $\pm$ 0.07 aB | 0.87 $\pm$ 0.87 aB | 0.00 $\pm$ 0.00 aB |
| Red PSN          | 28.53 $\pm$ 1.47 aA | 0.00 $\pm$ 0.00 aB | 1.47 $\pm$ 1.47 aB | 0.00 $\pm$ 0.00 aB |
| Black SN         | 30.00 $\pm$ 0.00 aA | 0.00 $\pm$ 0.00 aB | 0.00 $\pm$ 0.00 aB | 0.00 $\pm$ 0.00 aB |
