# Supplementary material for: Photo-Selective Nets and Pest Control: Searching Behavior of the Codling Moth Parasitoid Mastrus ridens (Hymenoptera: Ichneumonidae) under Varying Light Quantity and Quality Conditions
Source: MDPI journal article supplement (doi:10.3390/insects12070582), 2021-06-28
Supplement: s1 [file s1]

**Table S1.** Accumulated proportion of females *Mastrus ridens* that found the *Cydia pomonella* larvae during all time intervals observed ( $n=15$ ; mean  $\pm$  SE).

| Treatments | Time after the introduction of the parasitoid inside the experimental cage (h) |            |            |            |            |            |            |            |            |            |            |            |            |
|------------|--------------------------------------------------------------------------------|------------|------------|------------|------------|------------|------------|------------|------------|------------|------------|------------|------------|
|            | 0.5                                                                            | 1.0        | 1.5        | 2.0        | 2.5        | 3.0        | 3.5        | 4.0        | 4.5        | 5.0        | 5.5        | 6.0        | 24.0       |
| No PSN     | 0.07 $\pm$                                                                     | 0.07 $\pm$ | 0.07 $\pm$ | 0.07 $\pm$ | 0.13 $\pm$ | 0.13 $\pm$ | 0.13 $\pm$ | 0.20 $\pm$ | 0.27 $\pm$ | 0.33 $\pm$ | 0.33 $\pm$ | 0.40 $\pm$ | 0.47 $\pm$ |
| (control)  | 0.07                                                                           | 0.07       | 0.07       | 0.07       | 0.09       | 0.09       | 0.09       | 0.11       | 0.12       | 0.13       | 0.13       | 0.13       | 0.13       |
| Pearl PSN  | 0.07 $\pm$                                                                     | 0.07 $\pm$ | 0.27 $\pm$ | 0.27 $\pm$ | 0.27 $\pm$ | 0.33 $\pm$ | 0.47 $\pm$ |
|            | 0.07                                                                           | 0.07       | 0.12       | 0.12       | 0.12       | 0.13       | 0.13       | 0.13       | 0.13       | 0.13       | 0.13       | 0.13       | 0.13       |
| Red PSN    | 0.07 $\pm$                                                                     | 0.20 $\pm$ | 0.20 $\pm$ | 0.27 $\pm$ | 0.33 $\pm$ | 0.40 $\pm$ | 0.40 $\pm$ | 0.40 $\pm$ | 0.47 $\pm$ | 0.47 $\pm$ | 0.47 $\pm$ | 0.53 $\pm$ | 0.60 $\pm$ |
|            | 0.07                                                                           | 0.11       | 0.11       | 0.12       | 0.13       | 0.13       | 0.13       | 0.13       | 0.13       | 0.13       | 0.13       | 0.13       | 0.13       |
| Black SN   | 0.00 $\pm$                                                                     | 0.00 $\pm$ | 0.00 $\pm$ | 0.00 $\pm$ | 0.07 $\pm$ | 0.07 $\pm$ | 0.07 $\pm$ | 0.07 $\pm$ | 0.13 $\pm$ | 0.20 $\pm$ | 0.27 $\pm$ | 0.33 $\pm$ | 0.60 $\pm$ |
|            | 0.00                                                                           | 0.00       | 0.00       | 0.00       | 0.07       | 0.07       | 0.07       | 0.07       | 0.09       | 0.11       | 0.12       | 0.13       | 0.13       |
