# Supplementary material for: Photo-Selective Nets and Pest Control: Searching Behavior of the Codling Moth Parasitoid Mastrus ridens (Hymenoptera: Ichneumonidae) under Varying Light Quantity and Quality Conditions
Source: MDPI journal article supplement (doi:10.3390/insects12070582), 2021-06-28
Supplement: s1 [file s1]

**Table S2.** Host localization (p values) among treatments at 24 hours after the bioassay started according to the generalized linear model (glm) test.

| <b>Treatments</b> | <b>No PSN (control)</b> | <b>Pearl PSN</b> | <b>Red PSN</b> |
|-------------------|-------------------------|------------------|----------------|
| Pearl PSN         | 1.00                    | -                | -              |
| Red PSN           | 0.46                    | 0.46             | -              |
| Black SN          | 0.46                    | 0.46             | 1.00           |
